The authors thank Dr. W. B. Deal for his assistance in obtaining and interpreting cultures; Dr. I. F. Hawkins, Jr., for aid in interpreting x-rays; H. W. Calderwood, V.M.D., B. C. Ruiz, L. Rogow and C. Rogers for technical assistance; and P. M. Warwick for editorial assistance.

### References

1. Cameron JL, Mitchell WH, Zuidema GD: Aspiration pneumonia: Clinical outcome following documented aspiration. *Arch Surg* 106: 49-52, 1973
2. Bannister WK, Sattilaro AJ: Vomiting and aspiration during anesthesia. *ANESTHESIOLOGY* 23:251-264, 1962
3. Cameron JL, Anderson RP, Zuidema GD: Aspiration pneumonia. A clinical and experimental review. *J Surg Res* 7:44-53, 1967
4. Bannister WK, Sattilaro AJ, Otis RD: Therapeutic aspects of aspiration pneumonitis in experimental animals. *ANESTHESIOLOGY* 22: 440-443, 1961
5. Hamelberg W, Bosomworth PP: Aspiration pneumonitis: Experimental studies and clinical observations. *Anesth Analg (Cleve)* 43: 669-677, 1964
6. Cameron JL, Sebor J, Anderson RP, et al: Aspiration pneumonia. Results of treatment by positive-pressure ventilation in dogs. *J Surg Res* 8:447-457, 1968
7. Bosomworth PP, Hamelberg W: Etiologic and therapeutic aspects of aspiration pneumonitis. Experimental study. *Surg Forum* 13:158-159, 1962
8. Lawson DW, Defalco AJ, Phelps JA, et al: Corticosteroids as treatment for aspiration of gastric contents: An experimental study. *Surgery* 59:845-852, 1966
9. Teabeaut JR II: Aspiration of gastric contents. An experimental study. *Am J Pathol* 28:51-63, 1952
10. Greenfield LJ, Singleton RP, McCaffree DR, et al: Pulmonary effects of experimental graded aspiration of hydrochloric acid. *Ann Surg* 170:74-86, 1969
11. Mendelson CL: The aspiration of stomach contents into the lungs during obstetric anesthesia. *Am J Obstet Gynecol* 52:191-204, 1946
12. Tillotson JR, Finland M: Bacterial colonization and clinical superinfection of the respiratory tract complicating antibiotic treatment of pneumonia. *J Infect Dis* 119:597-624, 1969
13. Tillotson JR, Finland M: Secondary pulmonary infections following antibiotic therapy for primary bacterial pneumonia. *Antimicrobial Agents and Chemotherapy, American Society for Microbiology Interscience Conference on Antimicrobial Agents and Chemotherapy*, 1968, pp 326-330
14. Exarhos ND, Logan WD Jr, Abbott OA, et al: The importance of pH and volume in tracheobronchial aspiration. *Dis Chest* 47:167-169, 1965
15. Awe WC, Fletcher WS, Jacob SW: The pathophysiology of aspiration pneumonitis. *Surgery* 60:232-239, 1966
16. Taylor G, Pryse-Davies J: Evaluation of endotracheal steroid therapy in acid pulmonary aspiration syndrome (Mendelson's Syndrome). *ANESTHESIOLOGY* 29:17-21, 1968

### Metabolism

**ACCIDENTAL HYPOTHERMIA** The authors discuss a case of accidental hypothermia (initial rectal temperature 84.0 F) in an elderly woman found in her frigid, unheated home. On admission to the hospital, blood pressure and pulse rate (atrial fibrillation) were 90/40 torr and 127/min respectively. The patient was semiconscious, with blanched, anesthetic extremities. Arterial blood pH was 7.29. Azotemia, hemoconcentration, and hyperglycemia were also present. The patient was warmed over 14 hours by immersion in hot water (104 F) and with heating blankets. With warming, administration of intravenous fluids, and basic medical support, all pathologic conditions reverted to normal; a spontaneous return to normal sinus rhythm occurred at 89 F. At discharge the patient was asymptomatic. The shifts of plasma in the peripheral vasculature (as a cause for hemodilution upon rewarming), the effects of hypothermia on renal function (poor tubular water resorption with cold), general enzyme-activity depression (van't Hoff-Arrhenius' law) and attenuation of neurologic processes are discussed. (Meriwether, E. D., and others: *Severe Accidental Hypothermia with Survival after Rapid Rewarming*. *JAMA* 53: 505-510, 1973.)
